# Supplementary material
Source: Springer Nature journal article supplement (https://www.springermedizin.de/resource/supplementary/12943_2010_716_MOESM11_ESM.pdf/9554646)

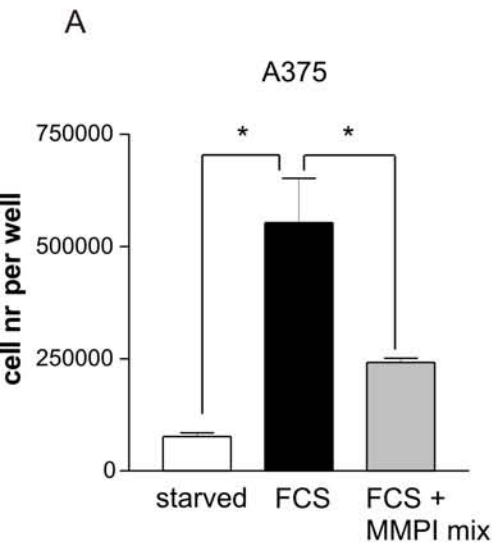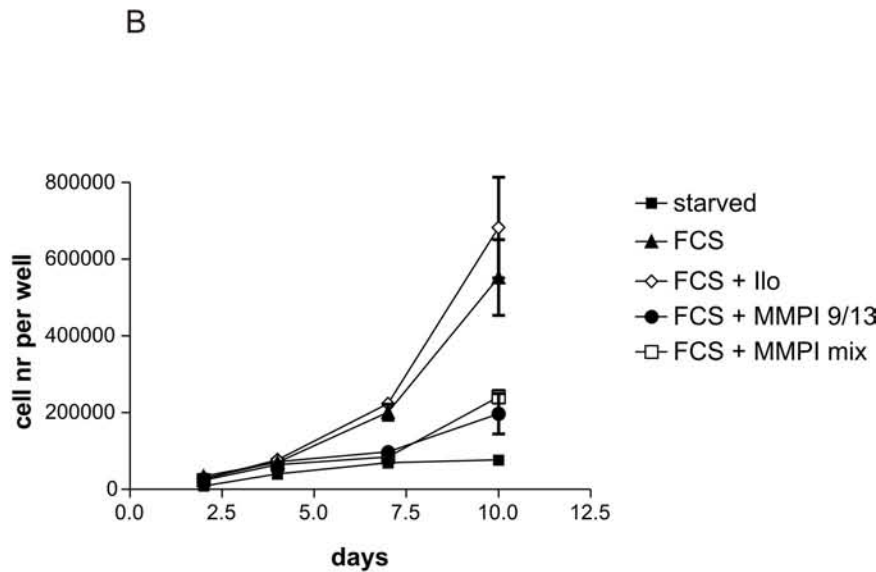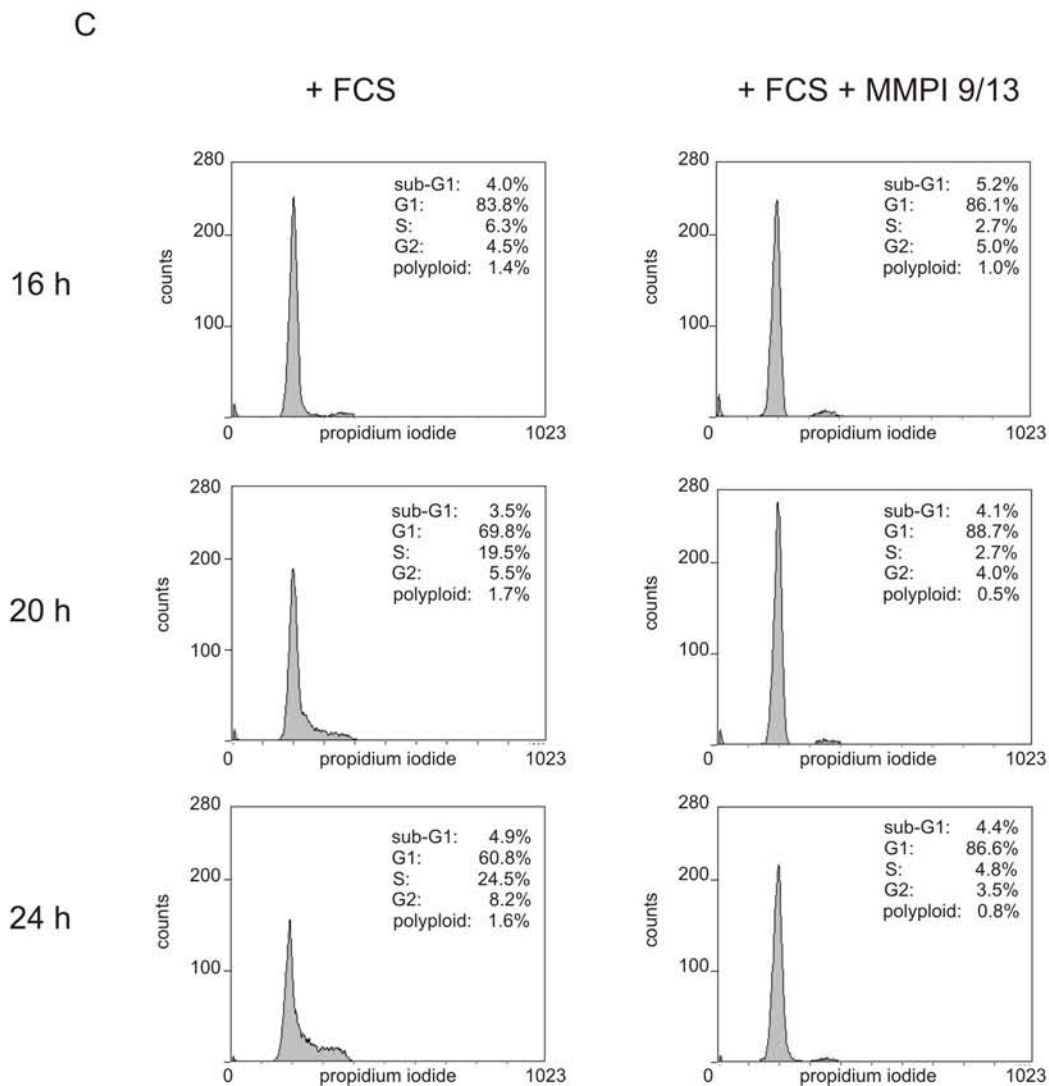

Supplement: MOESM11 [file 9554646]
